# Supplementary material for: A one-step route to solubilised, purified or functionalised single-walled carbon nanotubes
Source: Royal Society of Chemistry journal article supplement (doi:10.1039/c5ta03561a), 2015-01-01
Supplement: c5ta03561a1.pdf [file c5ta03561a1.pdf]

## Supporting Information

Debye lengths were calculated from  $\kappa^{-1} = (\epsilon_r \epsilon_0 k_B T / 2 p_\infty e^2)^{0.5}$  where  $\epsilon$  is relative permeability (37.8 for DMAc, 7.58 for THF),  $\epsilon_0$  is the electric constant,  $k_B$  is Boltzmann constant,  $T$  is absolute temperature (room temperature of 278 K is assumed),  $p_\infty$  is number density of the ion in  $\text{dm}^{-3}$  and  $e$  is elemental charge.

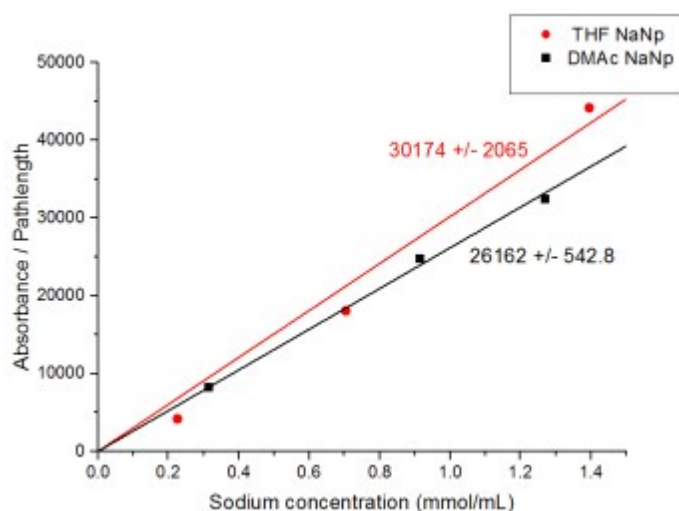

**ESI 1.** Extinction coefficient determination of NaNp in THF (761 nm) and DMAc (798 nm). Calculated using 100 times diluted samples (15  $\mu\text{L}$  solution and 1485  $\mu\text{L}$  solvent) and a 4 mm path length screw cap optical glass cuvette sealed with PTFE tape. Data fitted to pass through the origin and slopes are given next to the curves (standard errors supplied)

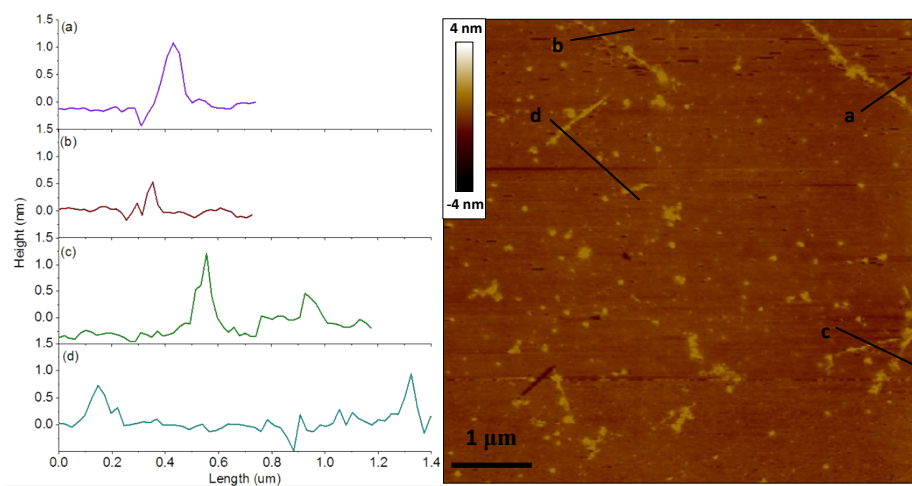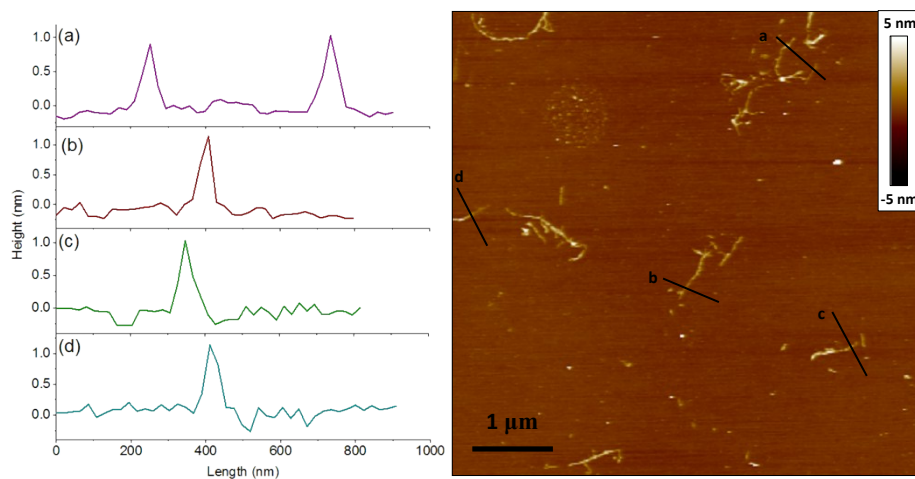

**ESI 2.** AFM of Elicarb SWCNTs dispersed with DMAC/NaNp (10:1); before (top) and after (bottom) reductive purification (20:1)

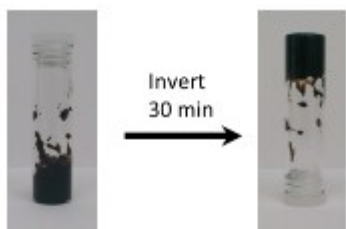

**ESI 3.** Picture of SWCNTs reduced at 10:1 C:Na in DMAc with a CNT system loading of  $6.5 \text{ mg mL}^{-1}$

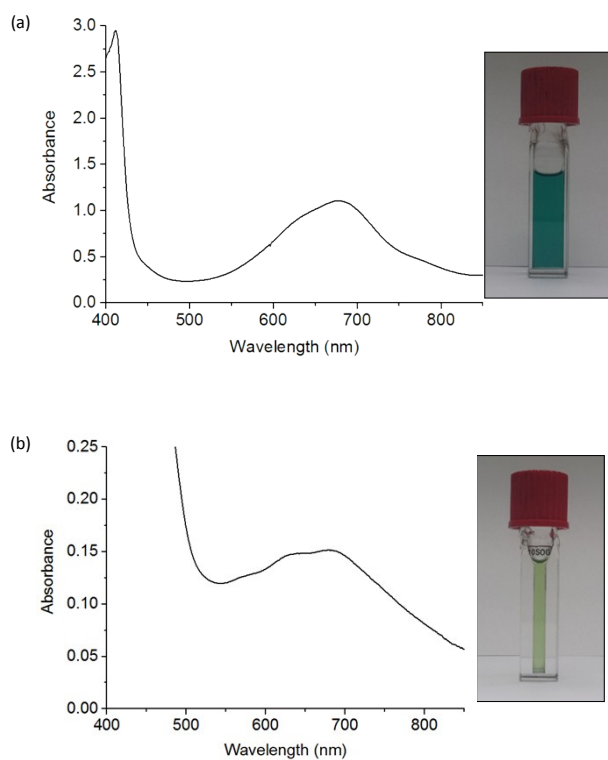

**ESI 4.** UV-Vis spectra and pictures of alternative single electron transport agents in DMAc. a) NaDTBP ( $0.2 \text{ mg(Na) mL}^{-1}$ ); b) KNp ( $0.1 \text{ mg(K) mL}^{-1}$ )

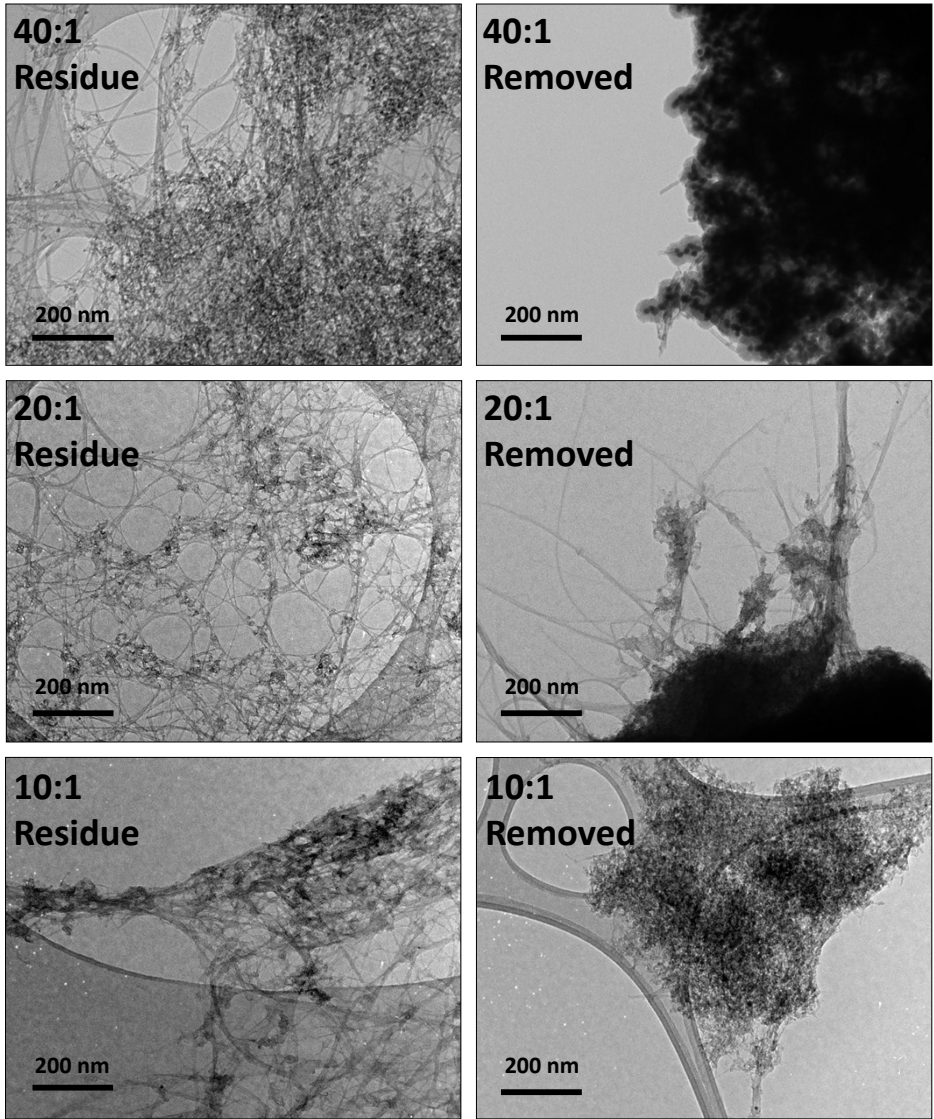

**ESI 5.** TEM of Elicarb purified nanotubes (left) and material removed (right)

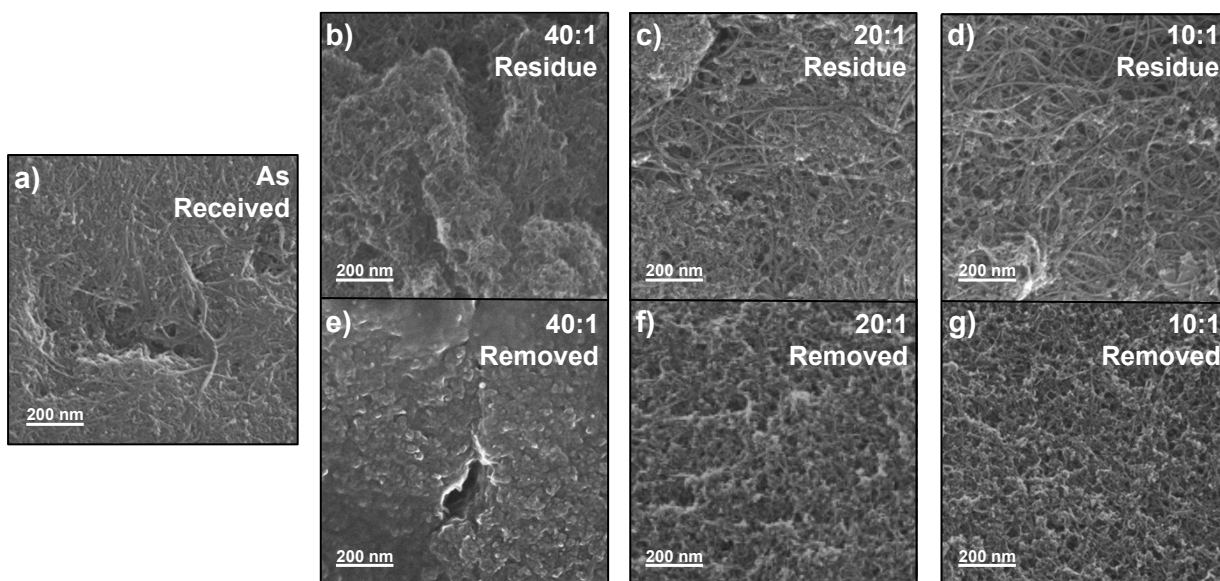

**ESI 6.** SEM of (a) as received SWCNTs, (b-d) Post-purified SWCNTs using b) 40:1 c) 20:1 and d) 10:1, and (e-g) Materials removed from purifications using e) 40:1 f) 20:1 and g) 10:1

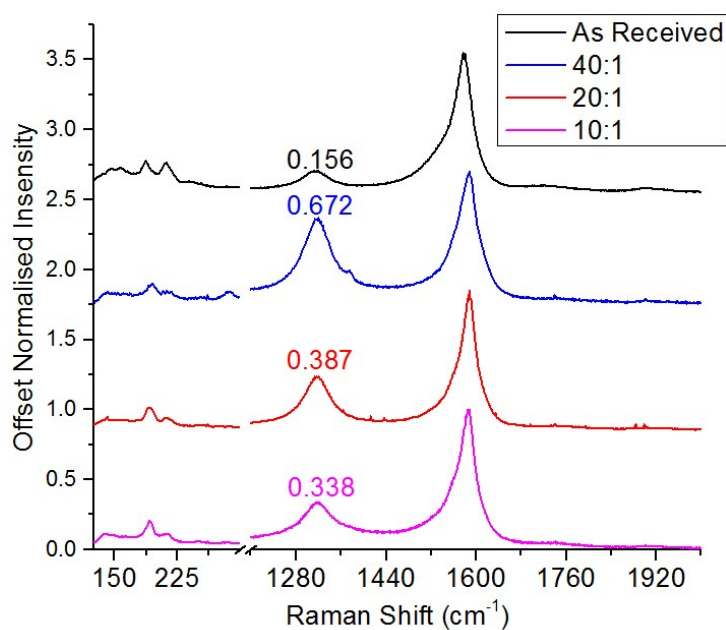

**ESI 7.** Raman (633 nm excitation) of as-received SWCNTs and filtered supernatant from different C:Na stoichiometry purifications after 48 h.

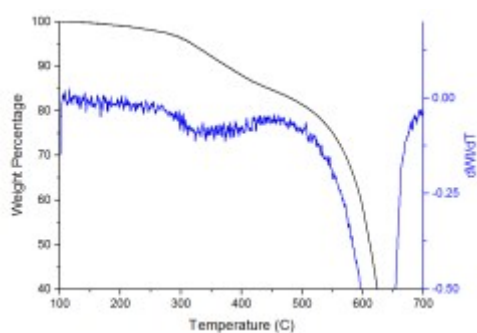

**ESI 8.** TGA and derivative of Elicarb-C<sub>4</sub>H<sub>9</sub> demonstrating the separation of alkyl and CNT degradation at 460 °C. Mass of alkyl fragments are measured from weight loss between 100 and 460°C.

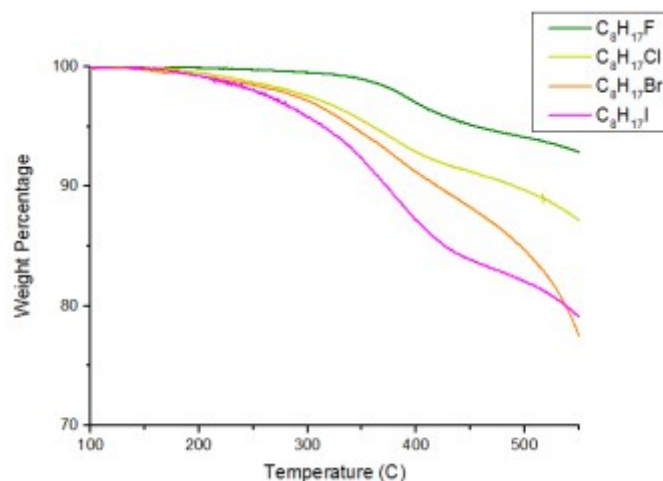

**ESI 9.** Typical TGAs of alkyl halide functionalised SWCNTs across an array of halides.

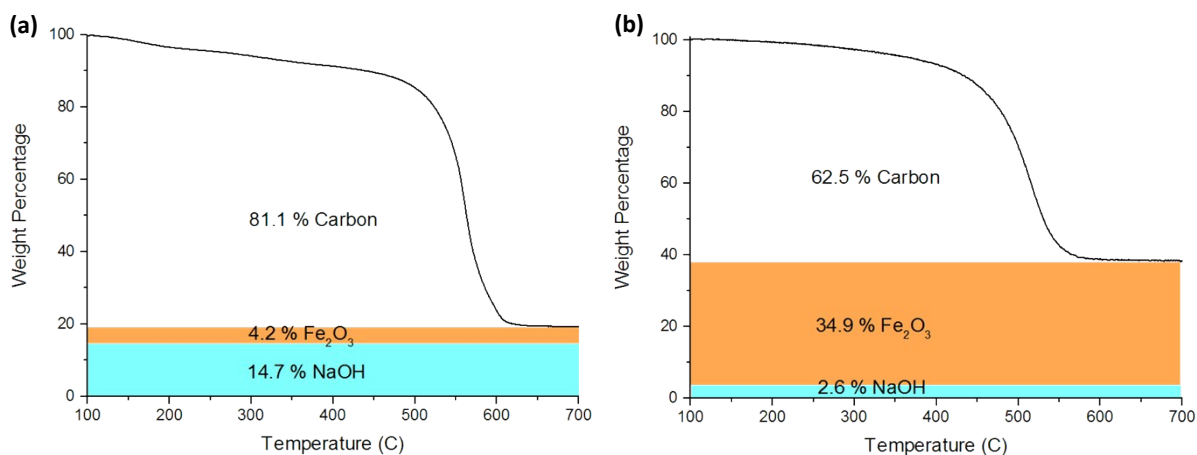

|                      | EDX (atom %) |      | TGA (wt. %) |           | NaOH (wt. %) | Fe <sub>2</sub> O <sub>3</sub> (wt. %) | Molar Ratio (normalised to Na) |      |      |
|----------------------|--------------|------|-------------|-----------|--------------|----------------------------------------|--------------------------------|------|------|
|                      | Na           | Fe   | Carbon      | Inorganic |              |                                        | Na                             | C    | Fe   |
| As-Received SWCNTs † |              |      | 92.5        | 7.5       | 0            | 7.5                                    | n/a                            | 1    | 0.01 |
| SWCNTs and Sodium ‡  |              |      | 79.3        | 20.7      | 6.4          | 14.3                                   | 1                              | 18.5 | 0.23 |
| Purified SWCNTs      | 63.6         | 36.4 | 81.1        | 18.9      | 12.0         | 6.9                                    | 1                              | 22.5 | 0.29 |
| Removed Impurities   | 13.1         | 86.9 | 62.5        | 37.5      | 4.9          | 32.6                                   | 1                              | 42.4 | 3.32 |

**ESI 10.** Oxidative TGA of a) unwashed purified Elicarb SWCNTs and b) material removed during purification (20:1), and table of relative Fe/Na atomic percentages from EDX (and calculated weight percentages and ratios). EDX was measured on post-TGA residue with atomic ratios calculated only between iron and sodium to eliminate contamination of scattered signal. Using the ratio of material dissolved during the purification (11 wt. %, Fig 6a, main text), the sum total iron content measured from TGA/EDX of dissolved and residual materials from purification can be calculated as 10.7 wt. % of the initial SWCNTs, close to the known value of 7.5 wt. % for as received SWCNTs demonstrating the validity of this test.

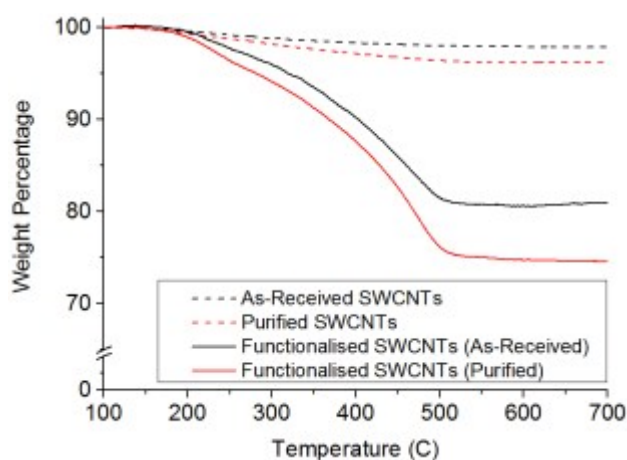

**ESI 11.** TGA of as-received and purified Elicarb before and after, reductive functionalisation with 1-iodododecane. Nanotubes purified using 20:1

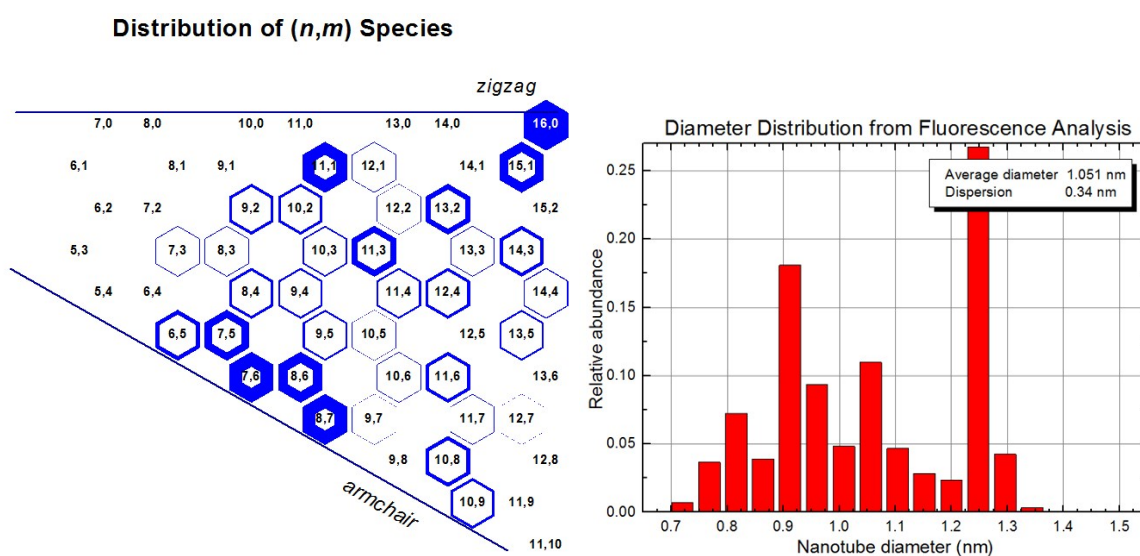

**ESI 12.** Chirality and diameter distributions of Elicarb SWCNTs (PR929, batch 108511/g). Nanotubes were probe sonicated in DOC (1 wt%) in D<sub>2</sub>O (~1 mg mL<sup>-1</sup>) and centrifuged at 42,000 g for 45 min. Measurements were taken with a Model NS1 NanoSpectralyzer (Applied NanoFluorescence, LLC) with data fitted to a preinstalled HiPco model.
